# Supplementary material
Source: PubMed Central journal article supplement (PMC1283946)
Supplement: 7600847s1.pdf [file 7600847s1.pdf]

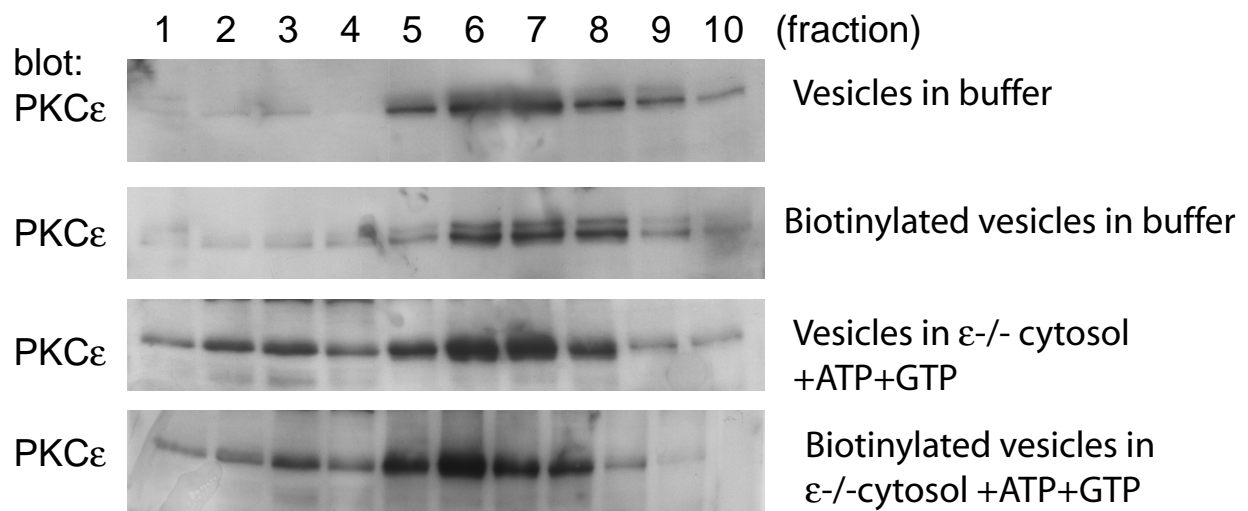

**Supplementary Figure 1.** Biotinylation of endocytic integrin vesicles does not interfere with the *in vitro* release reaction. PKC $\epsilon$  expressing cells (PKC $\epsilon$ RE) were treated with BIM-I for 90 minutes and accumulated, endocytic PKC $\epsilon$  and  $\beta$ 1-integrin positive vesicles were isolated by sucrose gradient fractionation (see experimental procedures). Fractions 7-9 were pooled from an equilibrium gradient, biotinylated or left untreated and sedimented at 100,000g. The recovered vesicles were resuspended in a small volume of buffer and incubated for 1h at 37°C as indicated, followed by refractionation on an equilibrium gradient. The biotinylated as well as the control vesicles behaved identically indicating that biotinylation does not interfere with the assay.
