# Supplementary material
Source: PubMed Central journal article supplement (PMC1283946)
Supplement: 7600847s3.pdf [file 7600847s3.pdf]

**A**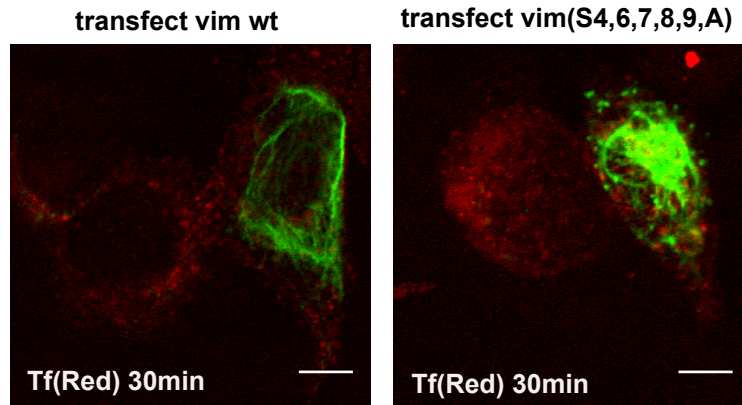**B**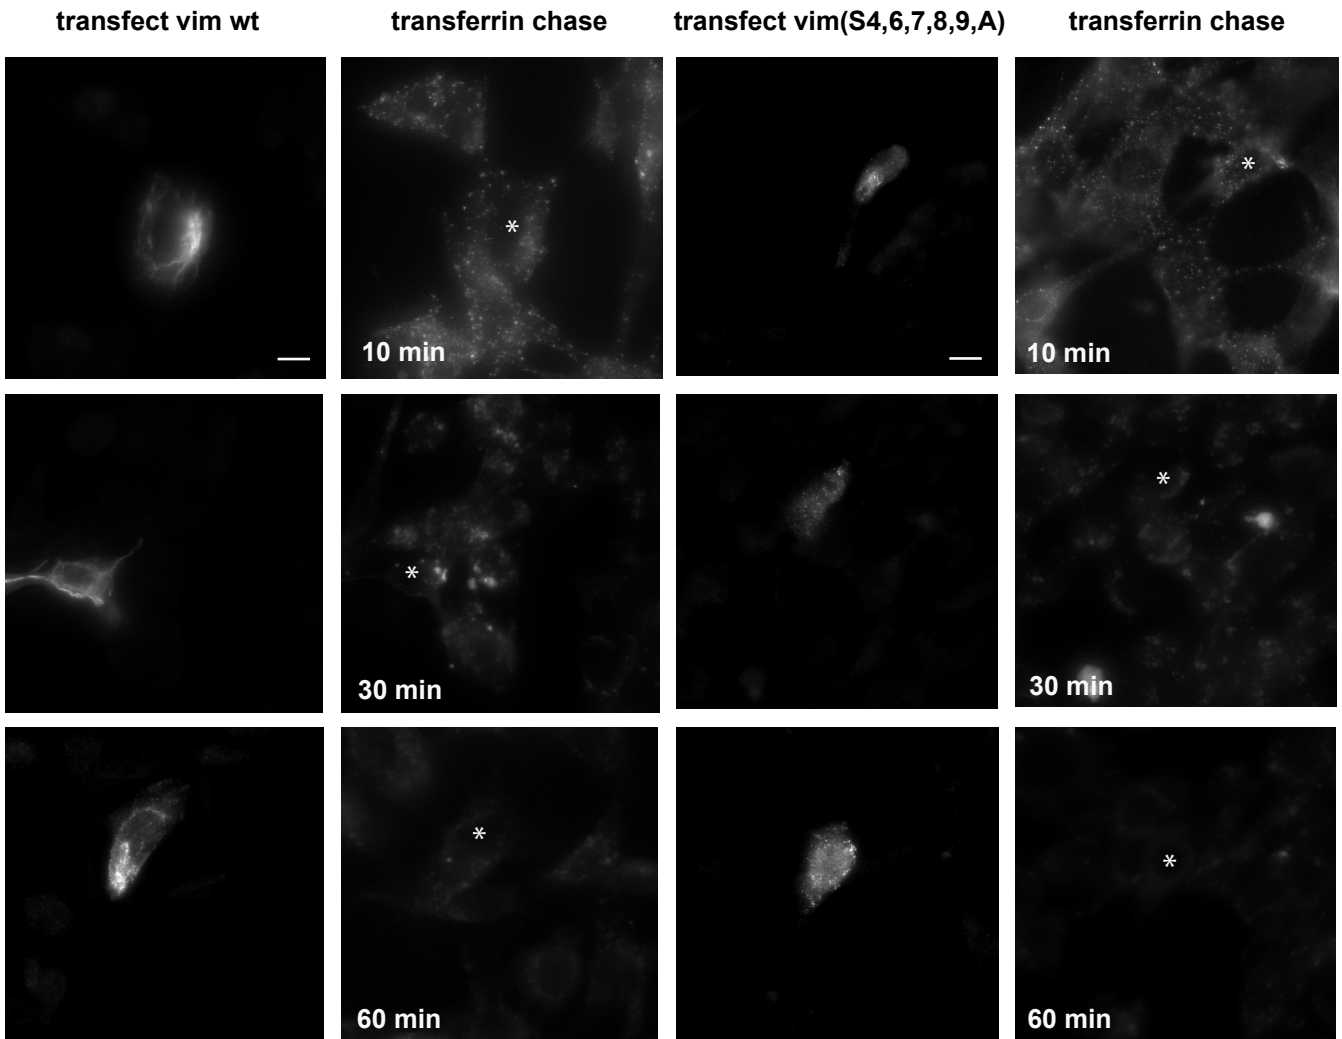

**Supplementary figure S3.** PKC $\epsilon$ RE cells were transiently transfected with wild-type human vimentin or vimentin(S4,6,7,8,9A). 48 hours post-transfection (**A**) the cells were allowed to internalise Alexa555-conjugated transferrin for 30min. Bar 10  $\mu$ m. (**B**) Conjugated transferrin was bound to the cell surface for 30min at +4  $^{\circ}$ C followed by a chase at +37  $^{\circ}$ C for the indicated times in the presence of excess unlabelled transferrin. \* vimentin transfected cell. Bar 20  $\mu$ m. (**A, B**) Ectopically expressed human vimentin was detected with antibody followed with Alexa488-conjugated secondary antibody to identify transfected cells.
